# Supplementary material for: Nitrogen- and oxygen-containing activated carbon nanotubes with improved capacitive properties
Source: Royal Society of Chemistry journal article supplement (doi:10.1039/c3ra45076g), 2013-12-17
Supplement: c3ra45076g.pdf [file c3ra45076g.pdf]

Electronic Supplementary Information (ESI) for

## Nitrogen- and oxygen-containing activated carbon nanotubes with improved capacitive properties

Zhenfang Zhou,<sup>a</sup> Zhonghua Zhang,<sup>a</sup> Hongrui Peng,<sup>a</sup> Yong Qin,<sup>b</sup> Guicun Li\*<sup>a</sup> and Kezheng Chen\*<sup>a</sup>

<sup>a</sup>Laboratory of Functional and Biological Nanomaterials, College of Materials Science and Engineering, Qingdao University of Science and Technology, Qingdao 266042, China. E-mail: guicunli@qust.edu.cn and kchen@qust.edu.cn.

<sup>b</sup>State Key Laboratory of Coal Conversion, Institute of Coal Chemistry, Chinese Academy of Sciences, Taiyuan, 030001, China.

**This PDF file includes:**

1. Fig. S1 and S3
2. Tab. S1 and S2

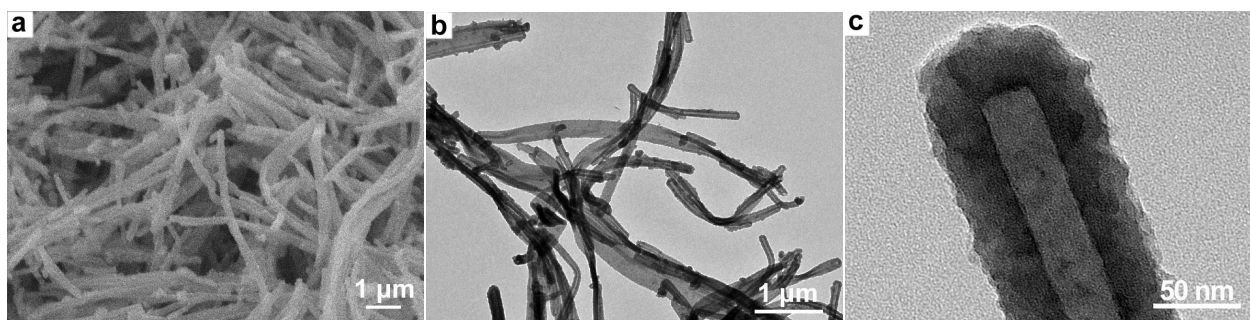

Fig. S1 SEM (a) and TEM (b and c) images of the PPy nanotube precursors.

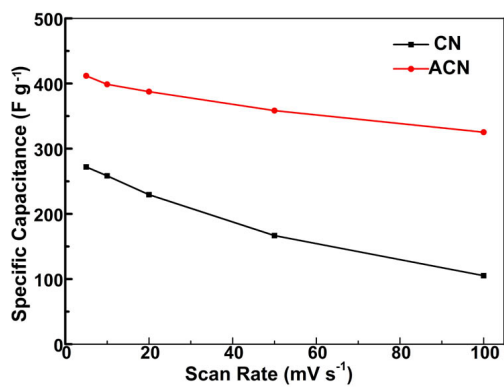

Fig. S2 The specific capacitance change as a function of scan rate.

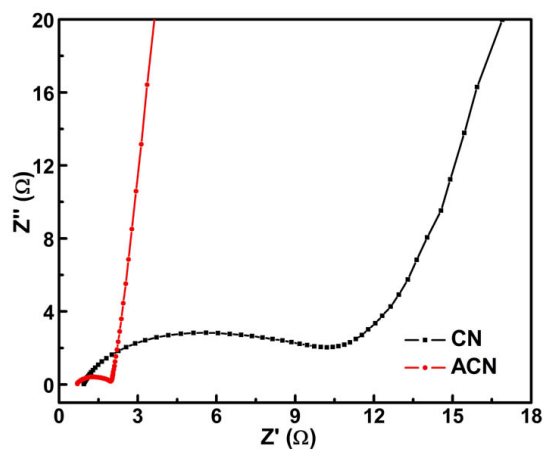

Fig. S3 Nyquist plots of both CN and ACN electrodes.

Tab. S1 Nitrogen contents, N/C ratio, and fitted results of N1s XPS spectra in the CN and ACN samples

| Samples | N <sub>XPS</sub><br>(wt.%) | N/C<br>(%) | Nitrogen contents from XPS (wt.%) |     |     |     |     |     |
|---------|----------------------------|------------|-----------------------------------|-----|-----|-----|-----|-----|
|         |                            |            | N1                                | N2  | N3  | N4  | N5  | N6  |
| CN      | 15.8                       | 19.7       | 6.3                               | 1.2 | 6.6 | 1.0 | 0.4 | 0.3 |
| ACN     | 19.8                       | 28.6       | 12.3                              | 1.0 | 3.4 | 2.3 | 0.8 | -   |

Tab. S2 Oxygen contents, O/C ratio, and fitted results of O1s XPS spectra in the CN and ACN samples

| Samples | O <sub>XPS</sub><br>(wt.%) | O/C<br>(%) | Oxygen contents from XPS (wt.%) |      |      |      |
|---------|----------------------------|------------|---------------------------------|------|------|------|
|         |                            |            | O1                              | O2   | O3   | O4   |
| CN      | 4.0                        | 5.0        | 1.15                            | 0.82 | 1.17 | 0.86 |
| ACN     | 11.1                       | 16.1       | 1.04                            | 3.48 | 3.24 | 3.34 |
